# Supplementary material
Source: HighWire-hosted journal article supplement (https://jnm.snmjournals.org/highwire/filestream/95502/field_highwire_adjunct_files/0/227652_Supplemental_Data.pdf)
Supplement: 227652_Supplemental_Data.pdf [file 227652_Supplemental_Data.pdf]

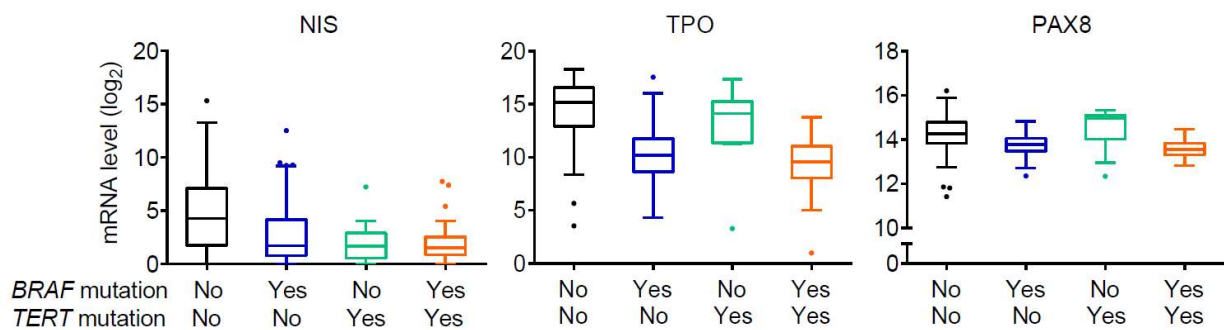

**Supplemental Figure 1. Box plots of mRNA expression of thyroid iodide-handling genes *NIS*, *TPO* and *PAX8* in papillary thyroid cancer in different genotype backgrounds.** For each thyroid gene, the entire cohort was divided into four genotype groups: no mutation, *BRAF* V600E alone, *TERT* mutation alone, and the genetic duet of the coexisting two mutations. The central horizontal lines represent medians and the box boundaries represent interquartiles. The sample sizes in the no mutation, *BRAF* V600E alone, *TERT* promoter mutation alone, and the genetic duet groups were 149, 198, 11, and 28, respectively. *TERT* promoter mutations here included collectively *TERT* C228T and *TERT* C250T.
